# Supplementary material for: Sex differences in the lung ACE/ACE2 balance in hypertensive rats
Source: PubMed Central journal article supplement (PMC8655502; doi:10.1042/bsr20211201), 2021-12-07
Supplement: BSR-2021-1201_supp.pdf [file BSR-2021-1201_supp.pdf]

## **SUPPLEMENTAL MATERIAL**

### **Sex differences in the lung ACE/ACE2 balance in hypertensive rats**

Flavia L. Martins<sup>1\*</sup>, Caio A. M. Tavares<sup>2\*</sup>, Pamella A. Malagrino<sup>1</sup>, Thiago Rentz<sup>1</sup>, Acaris Benetti<sup>1</sup>, Thiago M. S. Rios<sup>1</sup>, Gabriel M. D. Pereira<sup>1</sup>, Bruno Caramelli<sup>3</sup>, Samantha K. Teixeira<sup>1</sup>, José E. Krieger<sup>1</sup>, Adriana C. C. Girardi<sup>1</sup>

<sup>1</sup>Laboratory of Genetics and Molecular Cardiology, <sup>2</sup>Cardiogeriatric Unit, <sup>3</sup>Cardiology Interdisciplinary Medicine Unit, Heart Institute (InCor) – University of São Paulo Medical School, São Paulo, SP, Brazil

\* contributed equally to this work

Figure S1

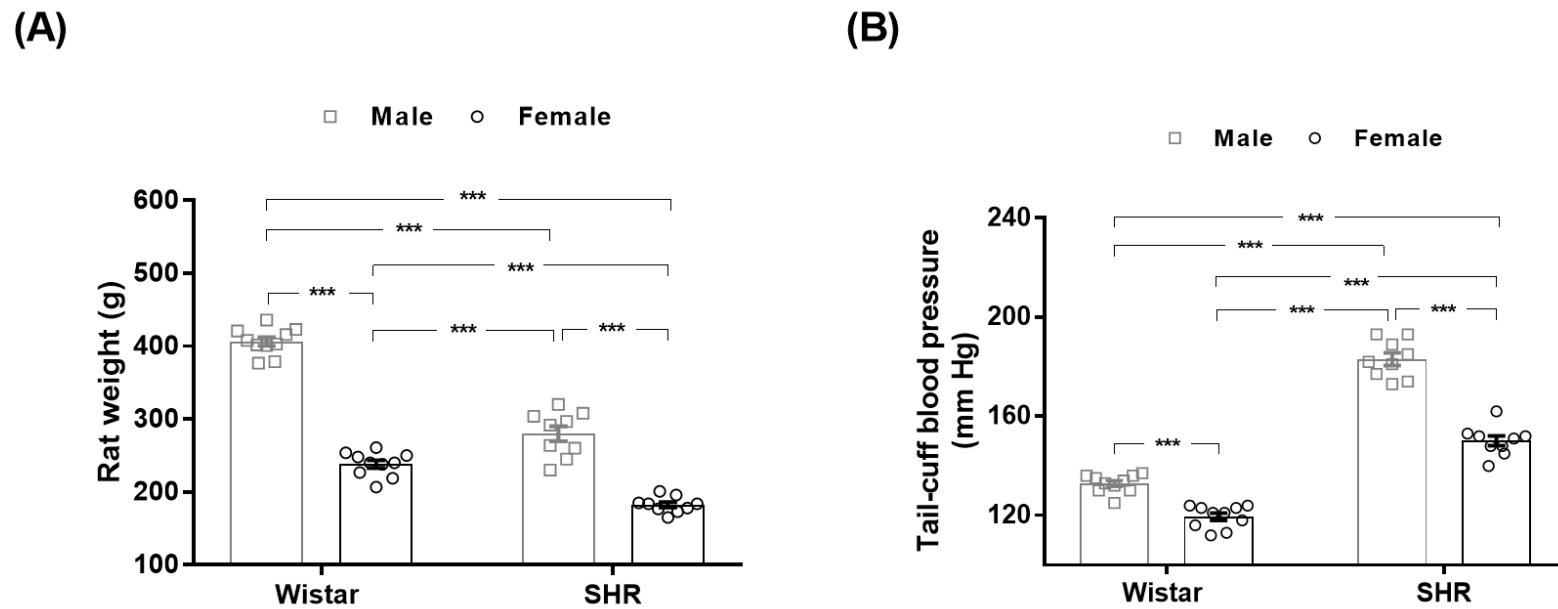

**Figure S1. Rat weight and tail-cuff blood pressure of male and female normotensive (Wistar) and hypertensive (SHR) rats. (A)** Rat weight and **(B)** tail-cuff blood pressure. Experimental n was indicated as scatter-dot, and the values represent individual measurements. Data were expressed as mean  $\pm$  SEM, and \*\*\* $P < 0.001$  were based on a two-way ANOVA and Tukey's multiple comparisons post-test.

**Figure S2**

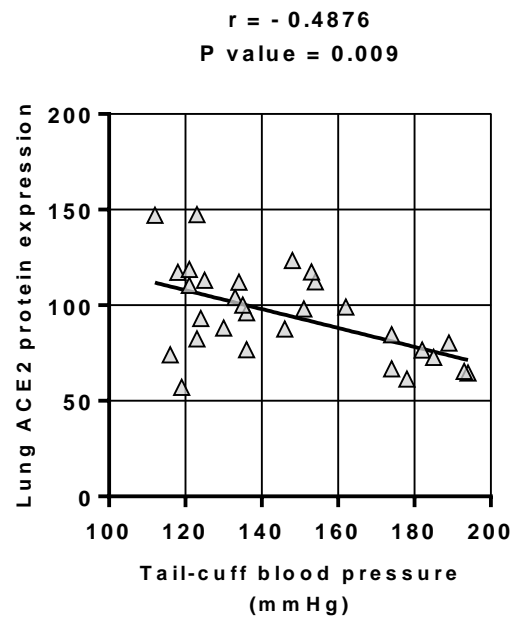

**Figure S2. The relationship between lung ACE2 protein abundance and blood pressure.** The correlation coefficient ( $r$ ) and P-value were obtained by Pearson's correlation test, and lines were obtained by linear regression plotting.

**Figure S3**

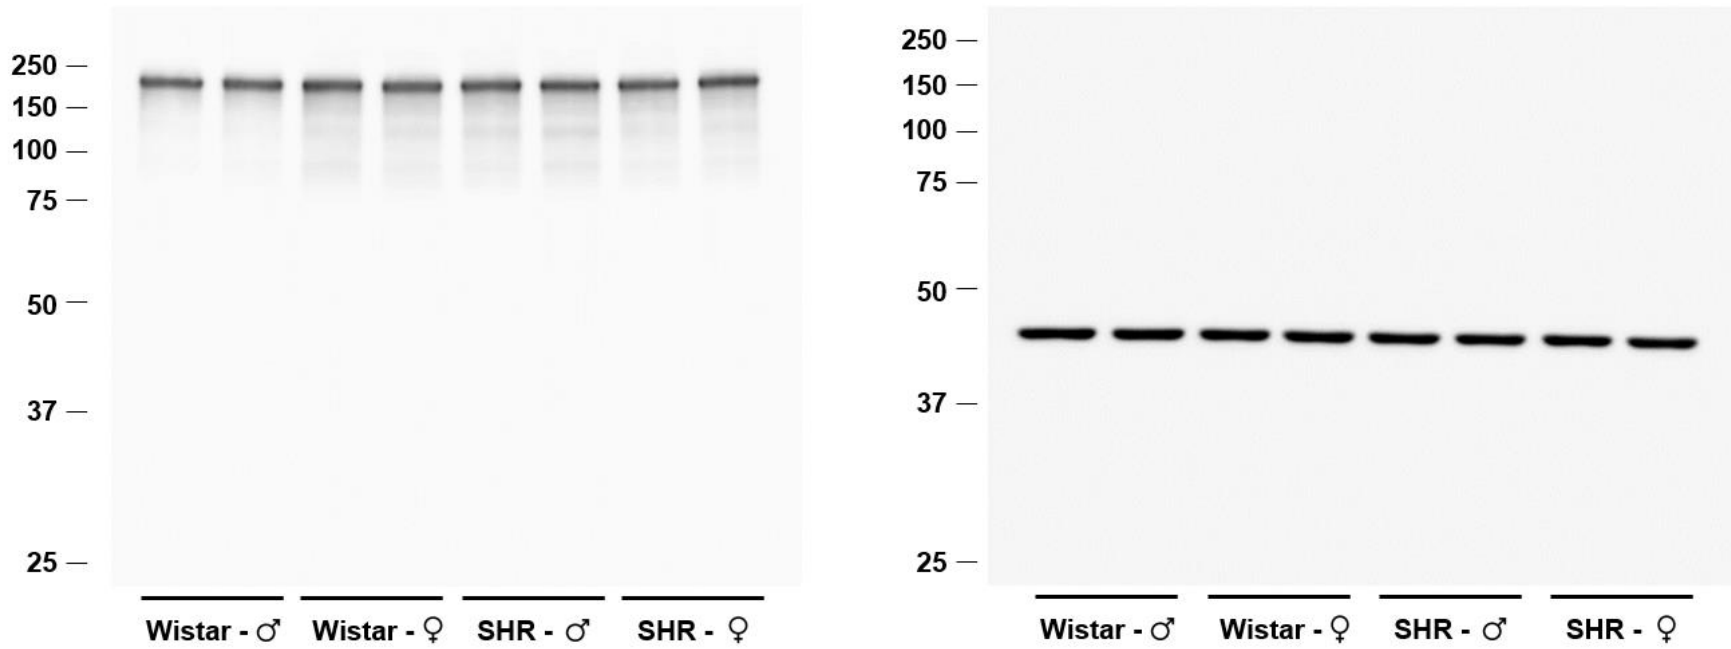

**Figure S3 – Full unedited gel for Figure 1D. Left panel: ACE and Right panel:  $\beta$ -actin, in the lung of male and female normotensive (Wistar) and hypertensive (SHR) rats. All lanes have been used to build Figure 1D.**

**Figure S4**

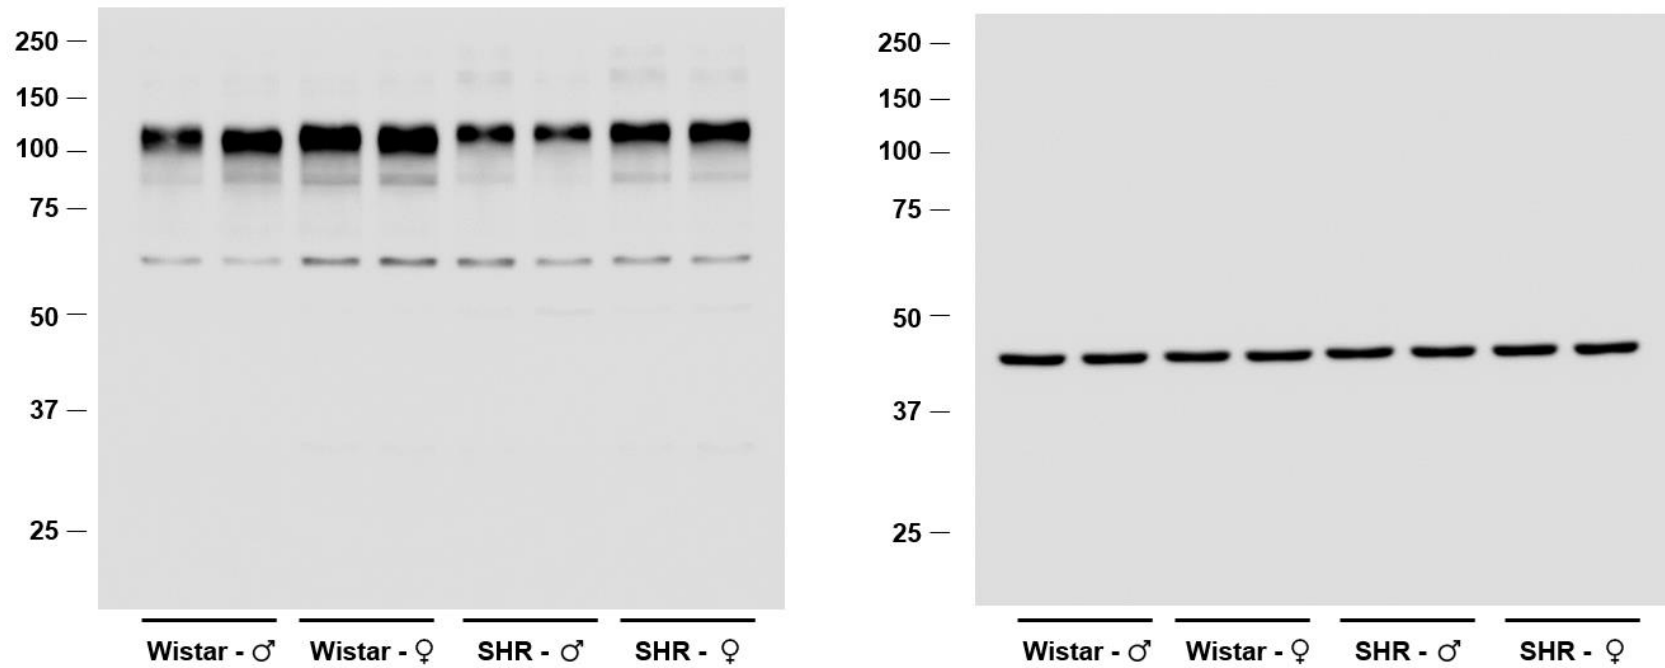

**Figure S4 – Full unedited gel for Figure 1E. Left panel: ACE2 and Right panel:  $\beta$ -actin, in the lung of male and female normotensive (Wistar) and hypertensive (SHR) rats. All lanes have been used to build Figure 1E.**

**Table S1 - Age and body mass index (BMI) of individuals present in the GTEx portal database and used for the analysis of pulmonary gene expression of ACE and ACE2**

|            |                 | <b>Normotensive</b> | <b>Hypertensive</b> |
|------------|-----------------|---------------------|---------------------|
|            | <b><i>n</i></b> | 311                 | 74                  |
|            | <b>Male</b>     | 217                 | 56                  |
|            | <b>Female</b>   | 94                  | 18                  |
| <b>Age</b> | <i>Average</i>  | 55.4                | 58.7                |
|            | <i>SD</i>       | 12.2                | 8.0                 |
|            | <i>Max</i>      | 70.0                | 70.0                |
|            | <i>Min</i>      | 21.0                | 34.0                |
|            | <i>Median</i>   | 57.0                | 59.0                |
| <b>BMI</b> | <i>Average</i>  | 27.7                | 28.3                |
|            | <i>SD</i>       | 4.2                 | 3.8                 |
|            | <i>Max</i>      | 35.0                | 34.9                |
|            | <i>Min</i>      | 17.0                | 19.0                |
|            | <i>Median</i>   | 27.9                | 28.3                |
